# Supplementary material for: Effectiveness of Strategies for Nutritional Therapy for Patients with Type 2 Diabetes and/or Hypertension in Primary Care: A Systematic Review and Meta-Analysis
Source: MDPI journal article supplement (doi:10.3390/ijerph19074243), 2022-04-02
Supplement: s1 [file s1]

# **Effectiveness of strategies for nutritional therapy for patients with type 2 diabetes and/or hypertension in primary care: systematic review of randomized controlled trials**

Contents:

**Table S1** Search Strategy PubMed

**Table S2** Excluded studies and main reason for exclusion

**Figure S1** Summary of risk of bias

**Figure S2** Meta-analysis of nutritional therapy for hypertension, sensitivity analysis without Hacıhasanoğlu. **A.** effect on systolic blood pressure, **B.** effect on diastolic blood pressure.

**Figure S3** Meta-analysis of nutritional therapy for hypertension for primary outcome (systolic blood pressure), subgroup analysis according to length of follow-up.

**Figure S4** Meta-analysis of nutritional therapy for hypertension for primary outcome (systolic blood pressure), subgroup analysis according to risk of bias. Abbreviations: SC: some concerns.

**Figure S5** Meta-analysis of nutritional therapy for hypertension for primary outcome (systolic blood pressure) separating studies that presented the results as mean adjusted difference (i.e. change score) or post-intervention values

**Figure S6** Meta-regression assessing follow up as modifier of the effect of nutritional therapy on HbA1c

**Figure S7** Meta-regression assessing mean age and mean HbA1cs as modifiers of the effect of nutritional therapy on HbA1c

**Figure S8** Meta-analysis of nutritional therapy for diabetes mellitus for primary outcome (HbA1c) without Javaid et al and Hörnstein et al.

**Figure S9** Meta-analysis of nutritional therapy for diabetes mellitus for primary outcome (HbA1c), subgroup analysis according to length of follow up.

**Figure S10** Meta-analysis of nutritional therapy for diabetes mellitus for primary outcome (HbA1c), subgroup analysis separating studies that presented the results as mean adjusted difference (i.e. change score) or post-intervention values.

**Figure S11** Meta-analysis of nutritional therapy for diabetes mellitus for primary outcome (HbA1c), subgroup analysis according to risk of bias.

**Figure S12** Meta-analysis of nutritional therapy for diabetes mellitus. Secondary outcome: systolic blood pressure.

**Figure S13** Meta-analysis of nutritional therapy for diabetes mellitus without Javaid et al. Secondary outcome: systolic blood pressure.

**Figure S14** Meta-analysis of nutritional therapy for diabetes mellitus. Secondary outcome: diastolic blood pressure.

**Figure S15** Meta-analysis of nutritional therapy for diabetes mellitus. Secondary outcome: body mass index.

**Figure S16** Funnel plot assessing publication bias on the meta-analysis of nutritional therapy for diabetes mellitus for the primary outcome (i.e.HbA1c)

**Table S1** Search Strategy PubMed

|                                           |                                                                                                                                                                                                                                                                                                                                                                                                                                                                                                                                                                                                                                                                                                                                                                                                                                                                                                                                                                                                                                                                                                                |
|-------------------------------------------|----------------------------------------------------------------------------------------------------------------------------------------------------------------------------------------------------------------------------------------------------------------------------------------------------------------------------------------------------------------------------------------------------------------------------------------------------------------------------------------------------------------------------------------------------------------------------------------------------------------------------------------------------------------------------------------------------------------------------------------------------------------------------------------------------------------------------------------------------------------------------------------------------------------------------------------------------------------------------------------------------------------------------------------------------------------------------------------------------------------|
| #1                                        | "Diabetes Mellitus, Type 2"[Mesh] OR (Diabetes Mellitus, Noninsulin-Dependent) OR (Diabetes Mellitus, Ketosis Resistant) OR (Ketosis-Resistant Diabetes Mellitus) OR (Diabetes Mellitus, Non Insulin Dependent) OR (Diabetes Mellitus, Non-Insulin-Dependent) OR (Non-Insulin-Dependent Diabetes Mellitus) OR (Diabetes Mellitus, Stable) OR (Stable Diabetes Mellitus) OR (Diabetes Mellitus, Type II) OR(NIDDM) OR (Diabetes Mellitus, Noninsulin Dependent) OR (Diabetes Mellitus, Maturity-Onset) OR (Diabetes Mellitus, Maturity Onset) OR (Maturity-Onset Diabetes Mellitus) OR (Maturity Onset Diabetes Mellitus) OR (MODY) OR (Diabetes Mellitus, Slow-Onset) OR (Diabetes Mellitus, Slow Onset) OR (Slow-Onset Diabetes Mellitus) OR (Type 2 Diabetes Mellitus) OR (Noninsulin-Dependent Diabetes Mellitus) OR (Noninsulin Dependent Diabetes Mellitus) OR (Maturity-Onset Diabetes) OR (Diabetes, Maturity-Onset) OR (Maturity Onset Diabetes) OR (Type 2 Diabetes) OR (Diabetes, Type 2) OR (Diabetes Mellitus, Adult-Onset) OR (Adult-Onset Diabetes Mellitus) OR (Diabetes Mellitus, Adult Onset) |
| #2                                        | "Hypertension"[Mesh] OR (Blood Pressure, High) OR (Blood Pressures, High) OR (High Blood Pressure) OR (High Blood Pressures)                                                                                                                                                                                                                                                                                                                                                                                                                                                                                                                                                                                                                                                                                                                                                                                                                                                                                                                                                                                   |
| #3                                        | "Primary Health Care"[Mesh] OR (Care, Primary Health) OR (Health Care, Primary) OR (Primary Healthcare) OR (Healthcare, Primary) OR (Primary Care) OR (Care, Primary) or "Physicians, Primary Care"[Mesh] OR (Physician, Primary Care) OR (Primary Care Physician) OR (Primary Care Physicians) OR (Healthy Primary Care) OR "Primary Care Nursing"[Mesh] OR (Care Nursing, Primary) OR (Nursing, Primary Care)                                                                                                                                                                                                                                                                                                                                                                                                                                                                                                                                                                                                                                                                                                |
| #4                                        | "Community Health Planning"[Mesh] OR (Community Health Plannings) OR (Health Planning, Community) OR (Health Plannings, Community) OR (Planning, Community Health) OR (Plannings, Community Health) OR (Population-Based Planning) OR (Planning, Population-Based) OR (Plannings, Population-Based) OR (Population Based Planning) OR (Population-Based Plannings) OR (Community Health Systems) OR (Community Health System) OR (Health System, Community) OR (Health Systems, Community) OR (System, Community Health) OR (Systems, Community Health)                                                                                                                                                                                                                                                                                                                                                                                                                                                                                                                                                        |
| #5                                        | "Nutrition Therapy"[Mesh] OR (Medical Nutrition Therapy) OR () OR (Therapy, Nutrition) OR (Nutrition Therapy, Medical) OR (Therapy, Medical Nutrition) OR (Nutrition Management) OR (Nutrition Strategy) OR (Nutrition Strategies) OR "Nutritionists"[Mesh] OR (Nutritionist) OR (Dieticians) OR (Dietician) OR (Dietitians) OR (Dietitian) OR (Registered Dietitian)                                                                                                                                                                                                                                                                                                                                                                                                                                                                                                                                                                                                                                                                                                                                          |
| #6                                        | "Life Style" [Mesh] OR (Life Styles) OR (Lifestyle) OR (Lifestyles) OR (Life Style Induced Illness) OR (Life Style Intervention) OR (Life Style Interventions) OR (Change of Life Style) OR "Health Behavior"[Mesh] OR (Behavior, Health) OR (Behaviors, Health) OR (Health Behaviors) OR "Healthy Lifestyle"[Mesh] OR (Lifestyle, Healthy) OR (Lifestyles, Healthy) OR (Healthy Life Styles) OR (Healthy Lifestyles) OR (Healthy Life Style) OR (Life Style, Healthy) OR (Life Styles, Healthy)                                                                                                                                                                                                                                                                                                                                                                                                                                                                                                                                                                                                               |
| #7                                        | randomized controlled trial[pt] OR controlled clinical trial[pt] OR randomized[tiab] OR placebo[tiab] OR clinical trials as topic[mesh:noexp] OR randomly[tiab] OR trial[ti] NOT (animals[mh] NOT humans [mh])                                                                                                                                                                                                                                                                                                                                                                                                                                                                                                                                                                                                                                                                                                                                                                                                                                                                                                 |
| #1 OR #2 AND #3 OR #4 AND #5 OR #6 AND #7 |                                                                                                                                                                                                                                                                                                                                                                                                                                                                                                                                                                                                                                                                                                                                                                                                                                                                                                                                                                                                                                                                                                                |

**Table S2.** Excluded studies and main reason for exclusion

| <b>Study</b>             | <b>Reason for exclusion</b>                        |
|--------------------------|----------------------------------------------------|
| <b>Diabetes Mellitus</b> |                                                    |
| Mattei da Silva 2020     | Cointervention not common to both groups           |
| Andrews 2011             | Intervention not delivered in primary care setting |
| Absetz 2007              | Patients did not meet eligibility criteria         |
| Acik 2005                | Non-randomized                                     |
| Alfawaz 2018             | Patients did not meet eligibility criteria         |
| Alghafri 2018            | Wrong intervention                                 |
| Allen 2011               | Wrong intervention                                 |
| Alonso-Dominguez 2019    | Wrong intervention                                 |
| Al-Shookri 2011          | Intervention not delivered in primary care setting |
| Azami 2018               | Intervention not delivered in primary care setting |
| Babazono 2007            | Patients did not meet eligibility criteria         |
| Bowen 2016               | Intervention inferior to 4 months                  |
| Carrasquillo 2017        | Wrong comparator                                   |
| Carter 2010              | Wrong intervention                                 |
| Chai 2018                | Intervention not delivered in primary care setting |
| Chee 2017                | Wrong comparator                                   |
| Clark 2004               | Intervention inferior to 4 months                  |
| Cohen 2011               | Wrong outcome                                      |
| Cooper 2008              | Intervention not delivered in primary care setting |
| Davies 2007              | Intervention inferior to 4 months                  |
| Debussche 2012           | Intervention not delivered in primary care setting |
| Debussche 2017           | Intervention not delivered in primary care setting |
| Delahanty 2015           | Wrong comparator                                   |
| Espeland 2014            | Wrong comparator                                   |
| Evans 2010               | Wrong intervention                                 |
| Two Feathers 2005        | Non-randomized                                     |
| Gagliardino 2013         | Wrong outcome                                      |
| Gallagher 2013           | Intervention not delivered in primary care setting |
| Gregg 2016               | Intervention not delivered in primary care setting |
| Guo 2013                 | Intervention not delivered in primary care setting |
| Gurka 2006               | Intervention not delivered in primary care setting |
| Hardeman 2014            | Wrong intervention                                 |
| Hendricks 2000           | Wrong comparator                                   |
| Hermanns 2017            | Intervention not delivered in primary care setting |
| Ishani 2011              | Intervention not delivered in primary care setting |
| Janssen 2009             | Intervention inferior to 4 months                  |
| Ji 2019                  | Intervention not delivered in primary care setting |
| Johansen 2017            | Intervention not delivered in primary care setting |
| Johnson 2016             | Non-randomized                                     |
| Johnston 2014            | Intervention not delivered in primary care setting |
| Kattelman 2009           | Intervention not delivered in primary care setting |
| Kempf 2018               | Intervention not delivered in primary care setting |
| Khunti 2012              | Intervention inferior to 4 months                  |
| Kumanyika 2018           | Patients did not meet eligibility criteria         |
| Laitinen 1993            | Intervention not delivered in primary care setting |
| Li 2016                  | Intervention inferior to 4 months                  |
| Lin 2014                 | Patients did not meet eligibility criteria         |

|                        |                                                    |
|------------------------|----------------------------------------------------|
| Maindal 2012           | Intervention inferior to 4 months                  |
| Merakou 2015           | Intervention inferior to 4 months                  |
| Mohamed 2013           | Intervention inferior to 4 months                  |
| Naik 2011              | Wrong comparator                                   |
| Prezio 2013            | Cointervention not common to both groups           |
| Ridgeway 1999          | Intervention not delivered in primary care setting |
| Sarkadi 2004           | Intervention not delivered in primary care setting |
| Shah 2015              | Wrong comparator                                   |
| Shakibazadeh 2015      | Intervention not delivered in primary care setting |
| Sharifirad 2013        | Intervention not delivered in primary care setting |
| Toobert 2003           | Intervention not delivered in primary care setting |
| Trento 2008            | Intervention not delivered in primary care setting |
| Philis-Tsimikas 2011   | Intervention inferior to 4 months                  |
| Van Rooijen 2010       | Intervention not delivered in primary care setting |
| Yannakoulia 2008       | Intervention not delivered in primary care setting |
| Zhang 2018             | Intervention not delivered in primary care setting |
| <b>Hypertension</b>    |                                                    |
| Appel 2003             | Intervention not delivered in primary care setting |
| Benfari 1981           | Cointervention not common to both groups           |
| Benner 2007            | Wrong intervention                                 |
| Ferrara 2012           | Intervention not delivered in primary care setting |
| Friedberg 2015         | Intervention not delivered in primary care setting |
| Fuchs 1993             | Intervention inferior to 4 months                  |
| Gorostegi-Anduaga 2018 | Intervention not delivered in primary care setting |
| Hasandokht 2015        | Intervention inferior to 4 months                  |
| Hayashi 2010           | Patients did not meet eligibility criteria         |
| Heisler 2012           | Wrong intervention                                 |
| Jehn 2006              | Wrong outcome                                      |
| Kucharska 2017         | Intervention not delivered in primary care setting |
| Lien 2007              | Intervention not delivered in primary care setting |
| Meinert 1989           | Patients did not meet eligibility criteria         |
| Mühlhauser 1993        | Intervention inferior to 4 months                  |
| New 2003               | Intervention not delivered in primary care setting |
| Nguyen-Huynh 2019      | Study Protocol                                     |
| Perl 2016              | Intervention inferior to 4 months                  |
| Sookaneknun 2004       | Intervention not delivered in primary care setting |
| Ter Bogt 2001          | Patients did not meet eligibility criteria         |
| Turnbull 2006          | Wrong intervention                                 |
| Wong 2015              | Wrong intervention                                 |

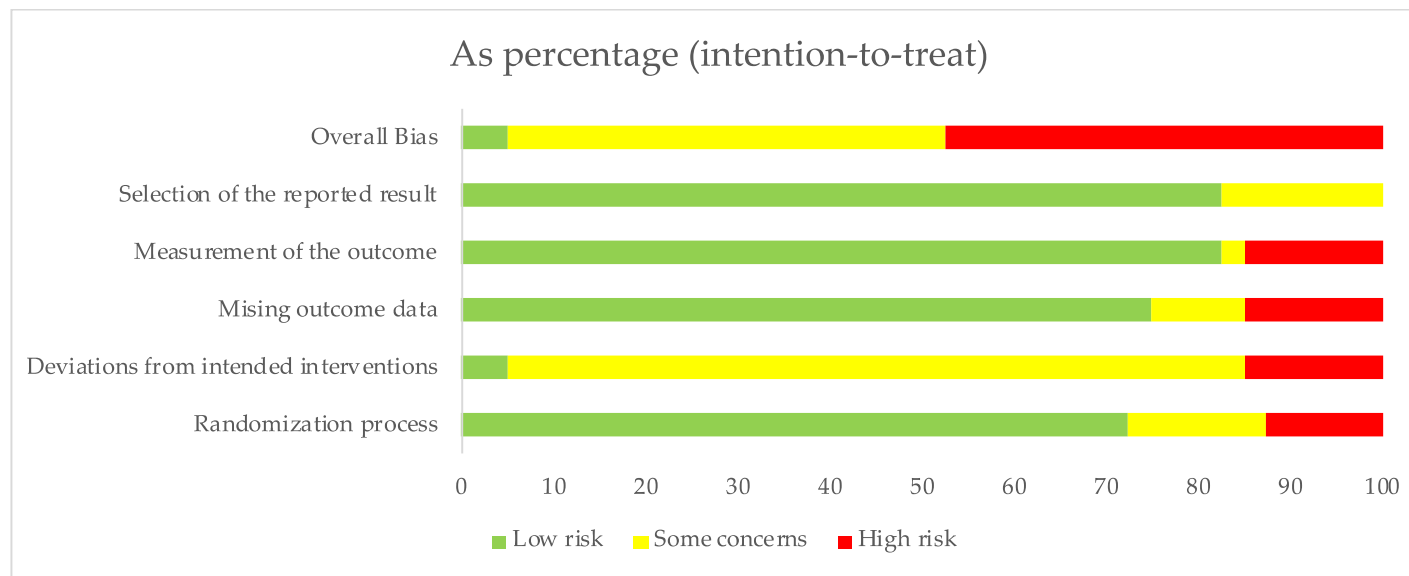

**Figure S1.** Summary of risk of bias

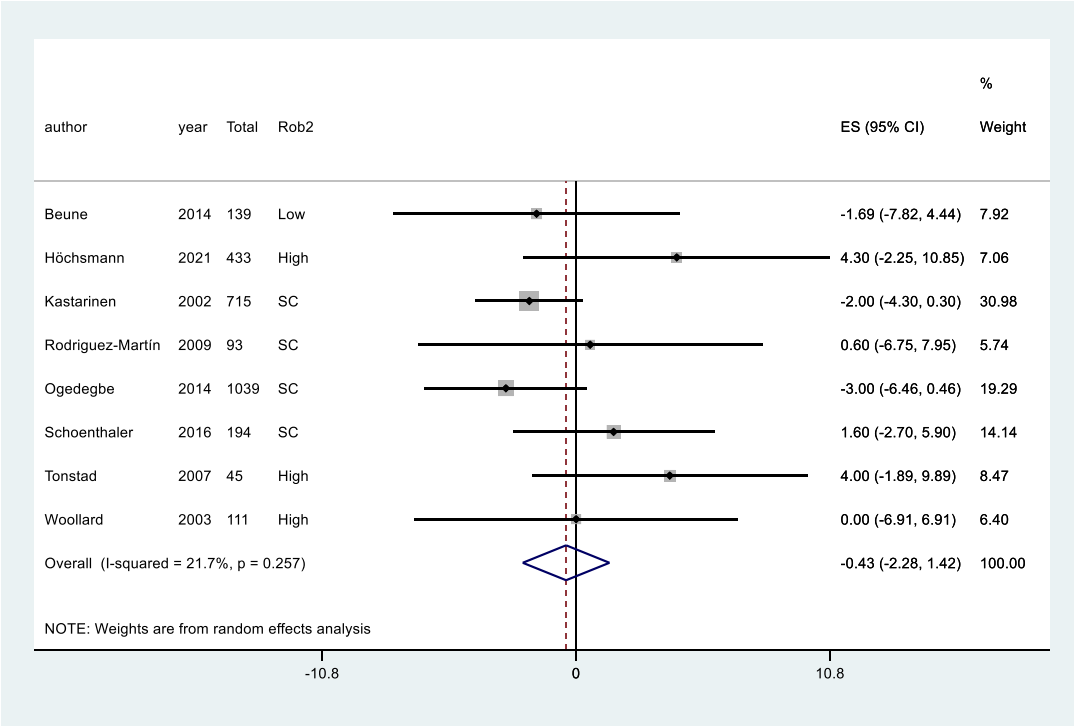

**A**

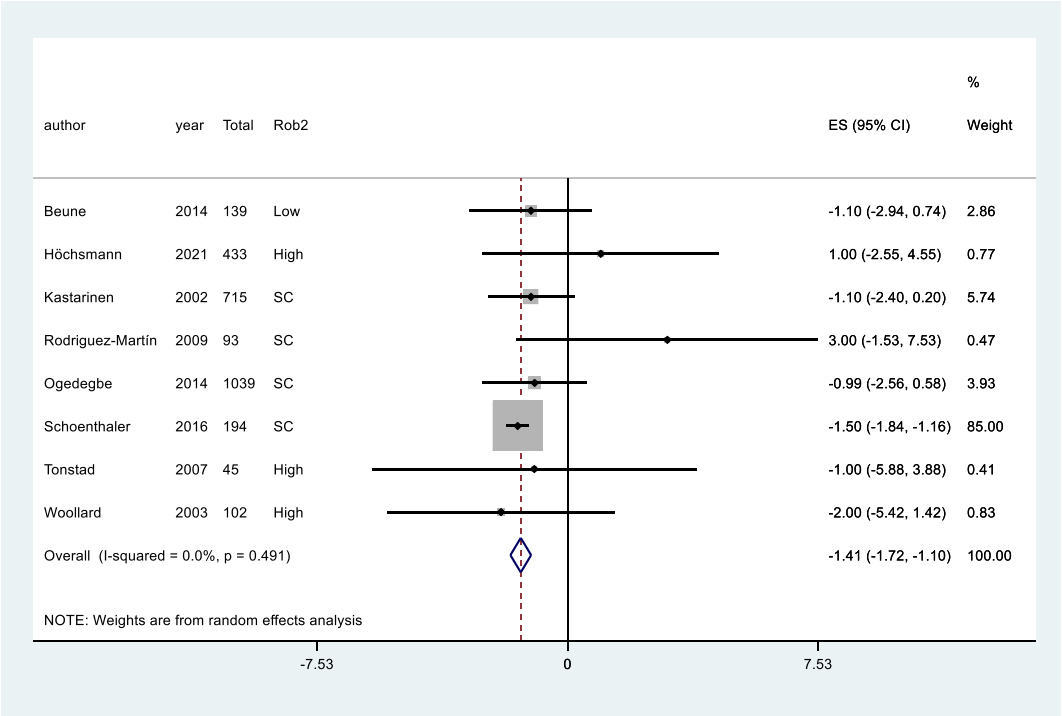

**B**

**Figure S2** Meta-analysis of nutritional therapy for hypertension, sensitivity analysis without Hacıhasanoğlu. **A.** effect on systolic blood pressure, **B.** effect on diastolic blood pressure.

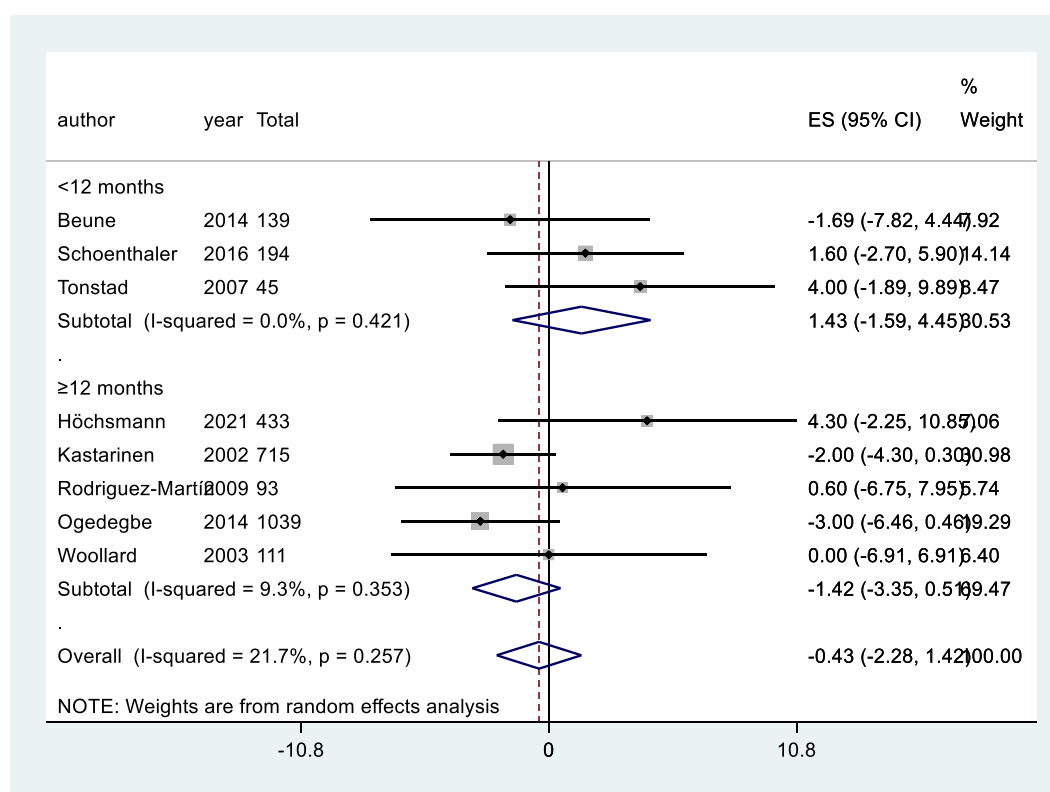

**Figure S3** Meta-analysis of nutritional therapy for hypertension for primary outcome (systolic blood pressure), subgroup analysis according to length of follow-up.

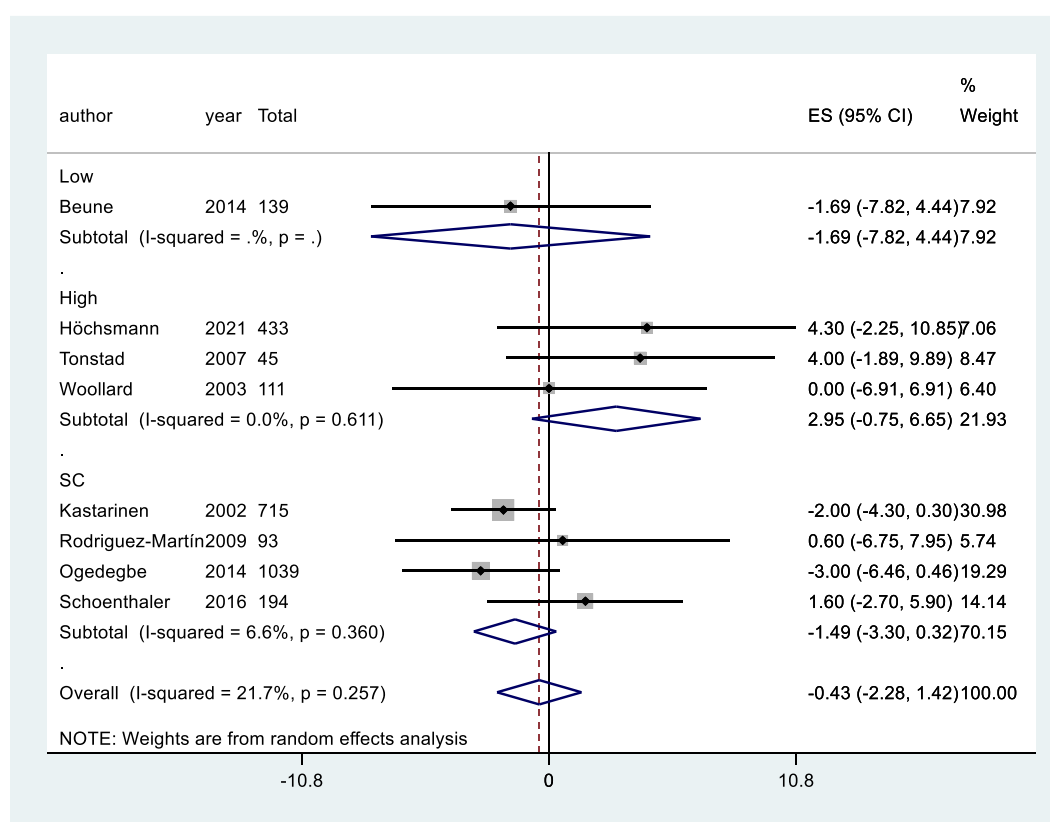

**Figure S4** Meta-analysis of nutritional therapy for hypertension for primary outcome (systolic blood pressure), subgroup analysis according to risk of bias. Abbreviations: SC: some concerns.

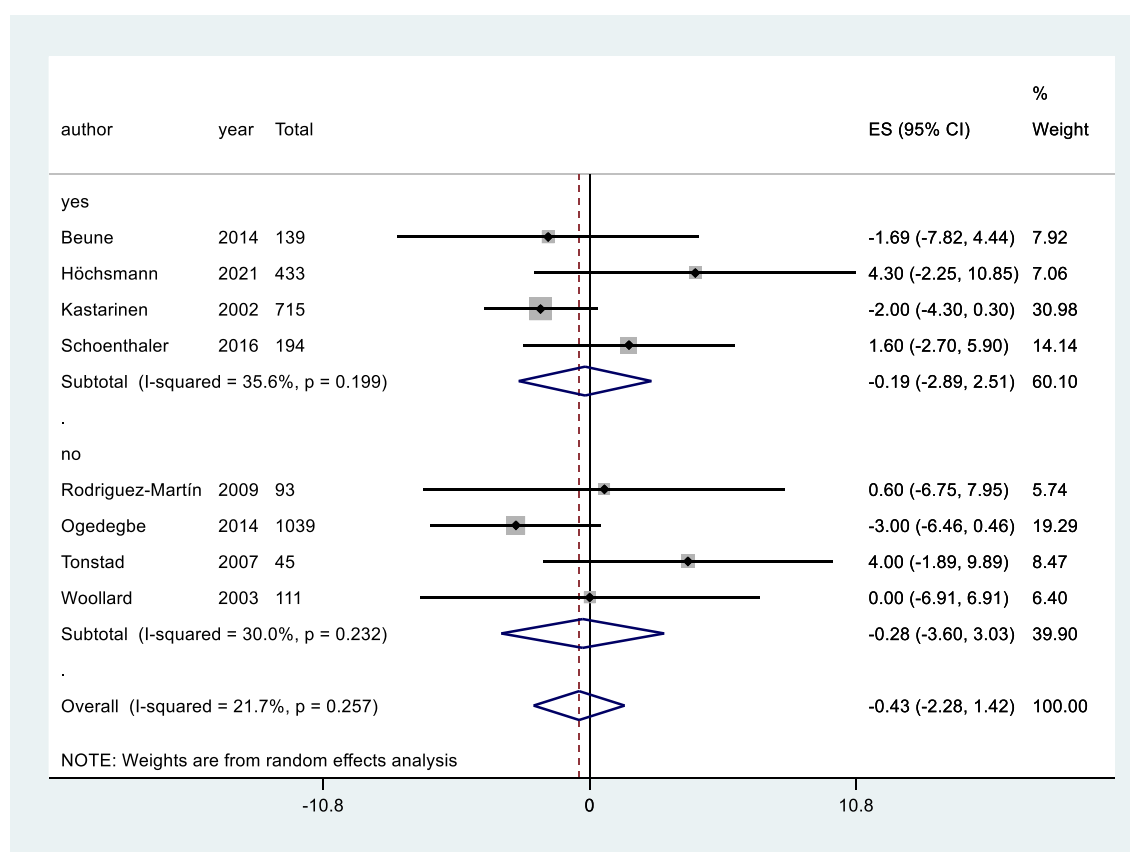

**Figure S5** Meta-analysis of nutritional therapy for hypertension for primary outcome (systolic blood pressure) separating studies that presented the results as mean adjusted difference (i.e. change score) or post-intervention values.

```
. xi:metareg    md dietic rob madcs follow, wsse(se)
```

| md     | Coefficient | Std. err. | t     | P> t  | [95% conf. interval] |
|--------|-------------|-----------|-------|-------|----------------------|
| dietic | .126805     | .2296136  | 0.55  | 0.586 | -.3493846 .6029945   |
| rob    | -.0545942   | .2061508  | -0.26 | 0.794 | -.4821248 .3729363   |
| madcs  | -.0510415   | .1986437  | -0.26 | 0.800 | -.4630033 .3609202   |
| follow | .2536292    | .2190916  | 1.16  | 0.259 | -.2007389 .7079973   |
| _cons  | -.589575    | .3252521  | -1.81 | 0.084 | -1.264107 .0849566   |

Meta-regression

REML estimate of between-study variance      Number of obs      =      27

% residual variation due to heterogeneity      tau2      =      .1772

Proportion of between-study variance explained      I-squared\_res      =      86.59%

Joint test for all covariates      Adj R-squared      =      -6.67%

With Knapp-Hartung modification      Model F(4,22)      =      0.58

Prob > F      =      0.6775

**Figure S6** Meta-regression assessing follow up as modifier of the effect of nutritional therapy on HbA1c



```
. metareg md meanage meanhba1c , wsse(se)
```

Meta-regression

|                                                |                 |        |
|------------------------------------------------|-----------------|--------|
| REML estimate of between-study variance        | Number of obs = | 26     |
| % residual variation due to heterogeneity      | tau2 =          | .1554  |
| Proportion of between-study variance explained | I-squared_res = | 81.99% |
| Joint test for all covariates                  | Adj R-squared = | 10.04% |
| With Knapp-Hartung modification                | Model F(2,23) = | 1.80   |
|                                                | Prob > F =      | 0.1881 |

| md        | Coefficient | Std. err. | t     | P> t  | [95% conf. interval] |          |
|-----------|-------------|-----------|-------|-------|----------------------|----------|
| meanage   | .0285371    | .0243296  | 1.17  | 0.253 | -.0217925            | .0788667 |
| meanhba1c | -.0583827   | .0694295  | -0.84 | 0.409 | -.2020085            | .0852431 |
| _cons     | -1.574059   | 1.746094  | -0.90 | 0.377 | -5.18613             | 2.038012 |

**Figure S7** Meta-regression assessing mean age and mean HbA1cs as modifiers of the effect of nutritional therapy on HbA1c

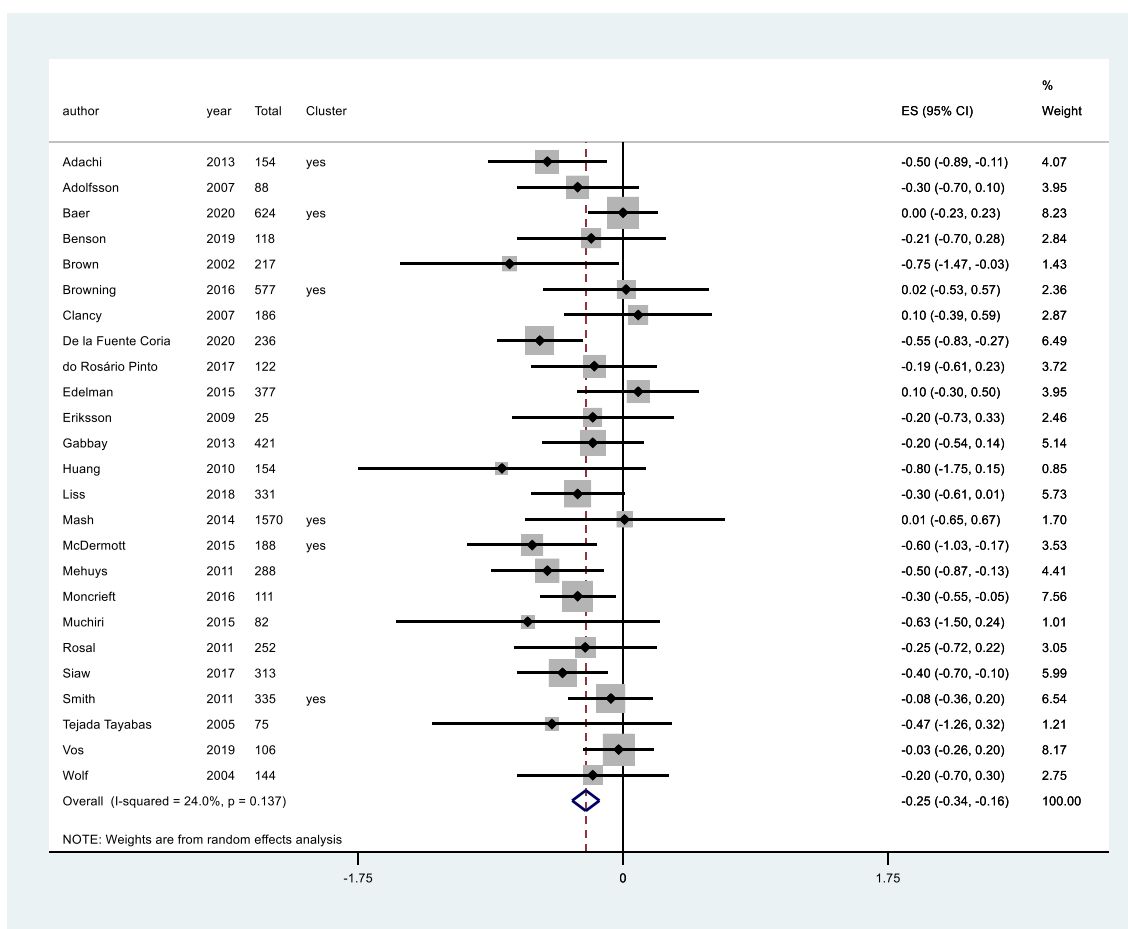

**Figure S8** Meta-analysis of nutritional therapy for diabetes mellitus for primary outcome (HbA1c) without Javaid et al and Hörnstein et al.

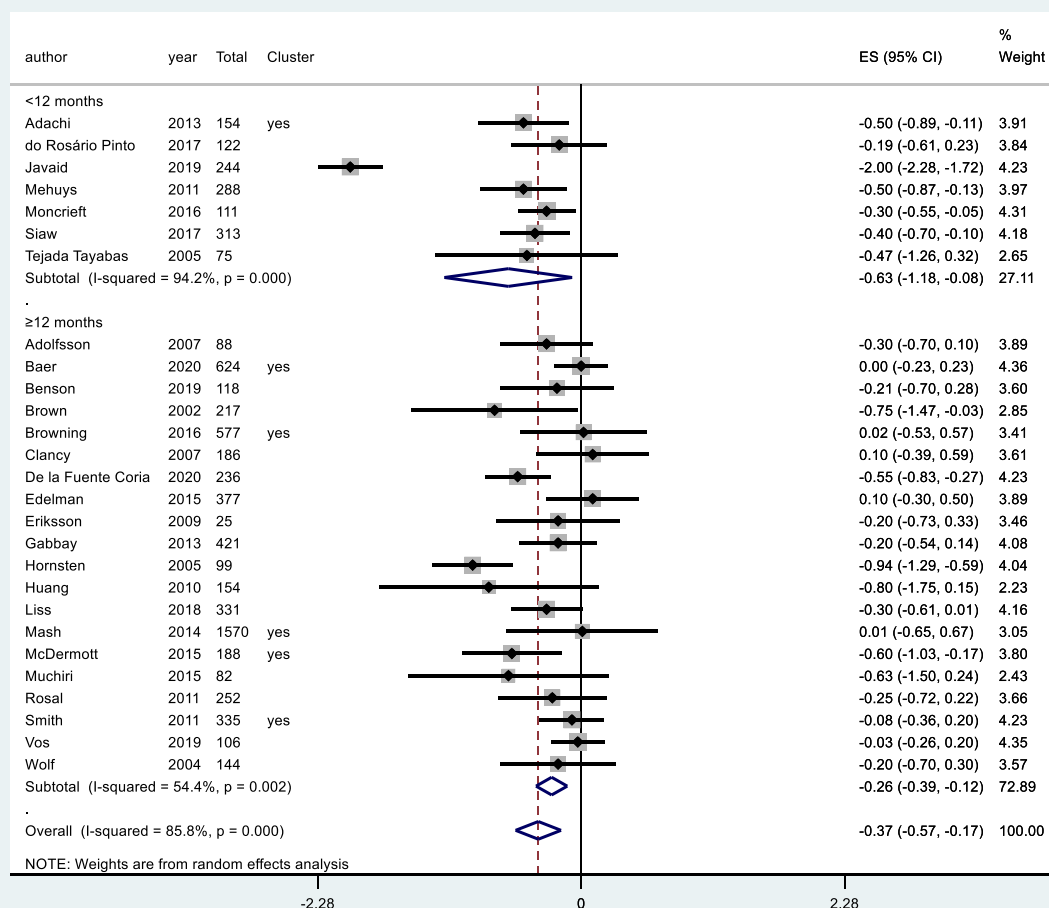

**Figure S9** Meta-analysis of nutritional therapy for diabetes mellitus for primary outcome (HbA1c), subgroup analysis according to length of follow up.

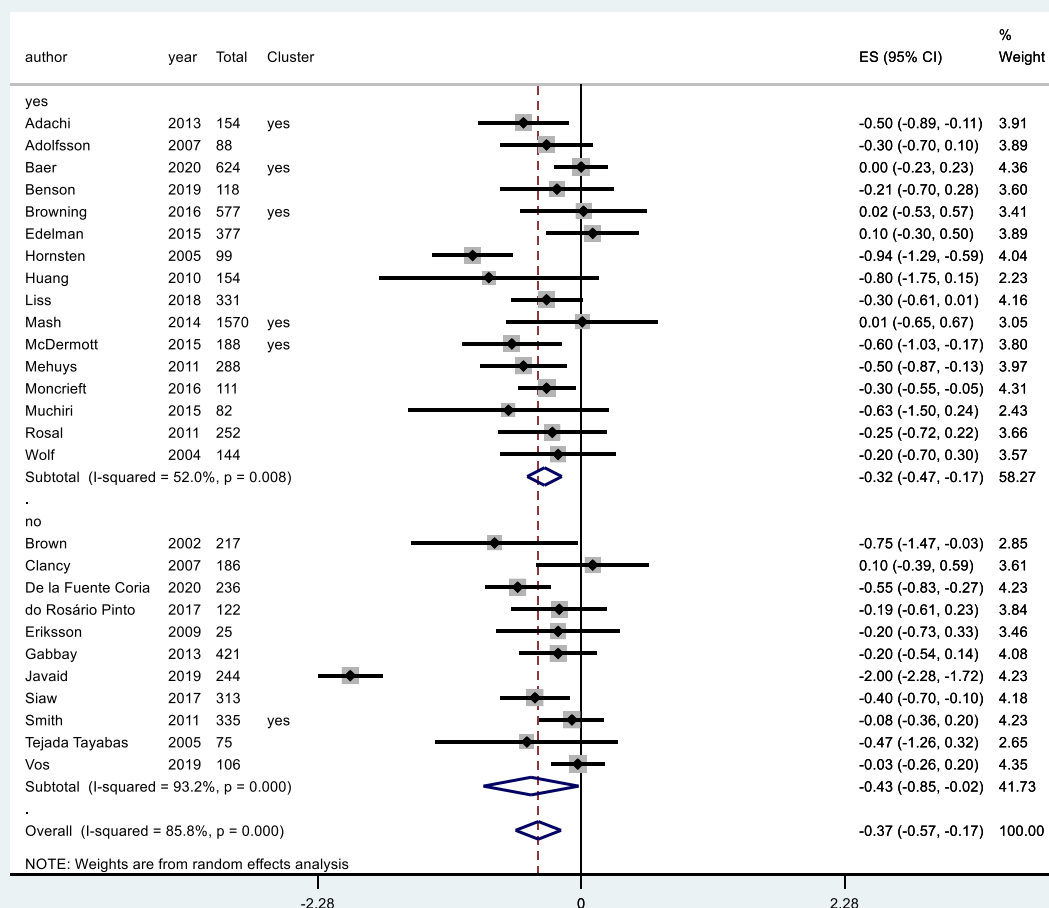

**Figure S10** Meta-analysis of nutritional therapy for diabetes mellitus for primary outcome (HbA1c), subgroup analysis separating studies that presented the results as mean adjusted difference (i.e. change score) or post-intervention values.

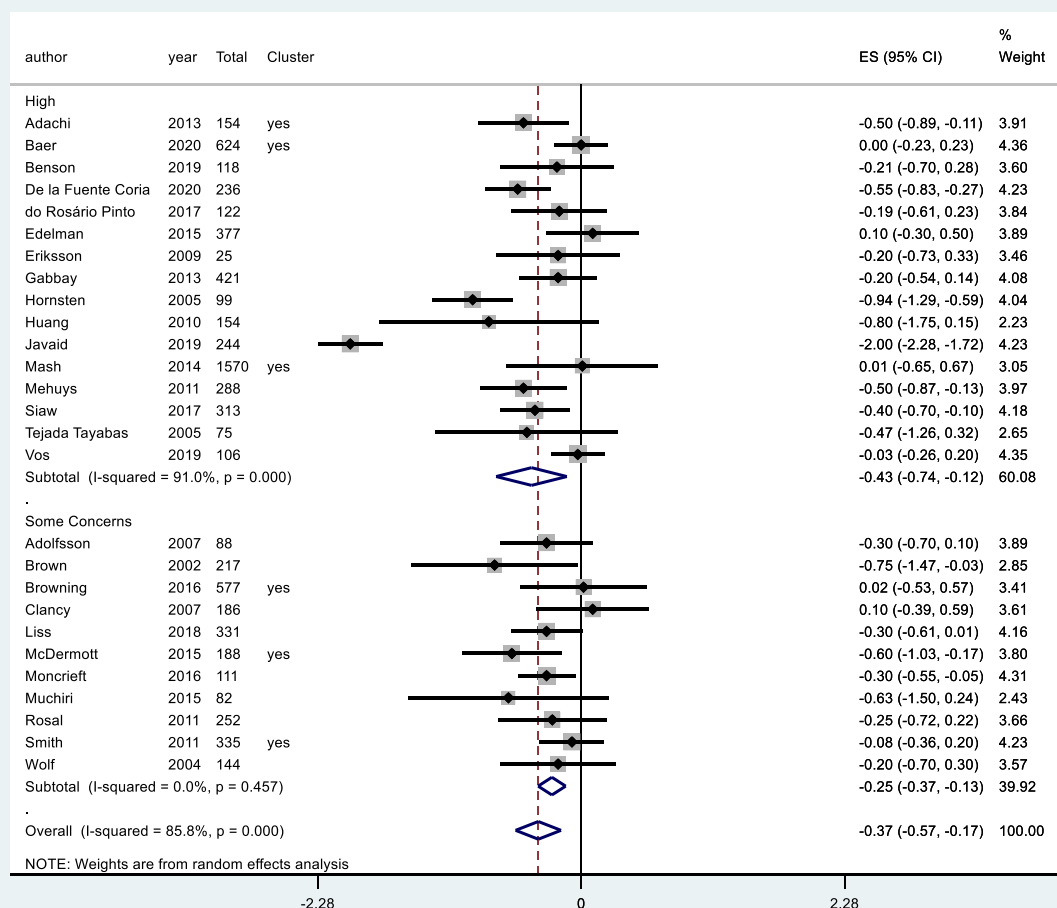

**Figure S11** Meta-analysis of nutritional therapy for diabetes mellitus for primary outcome (HbA1c), subgroup analysis according to risk of bias.

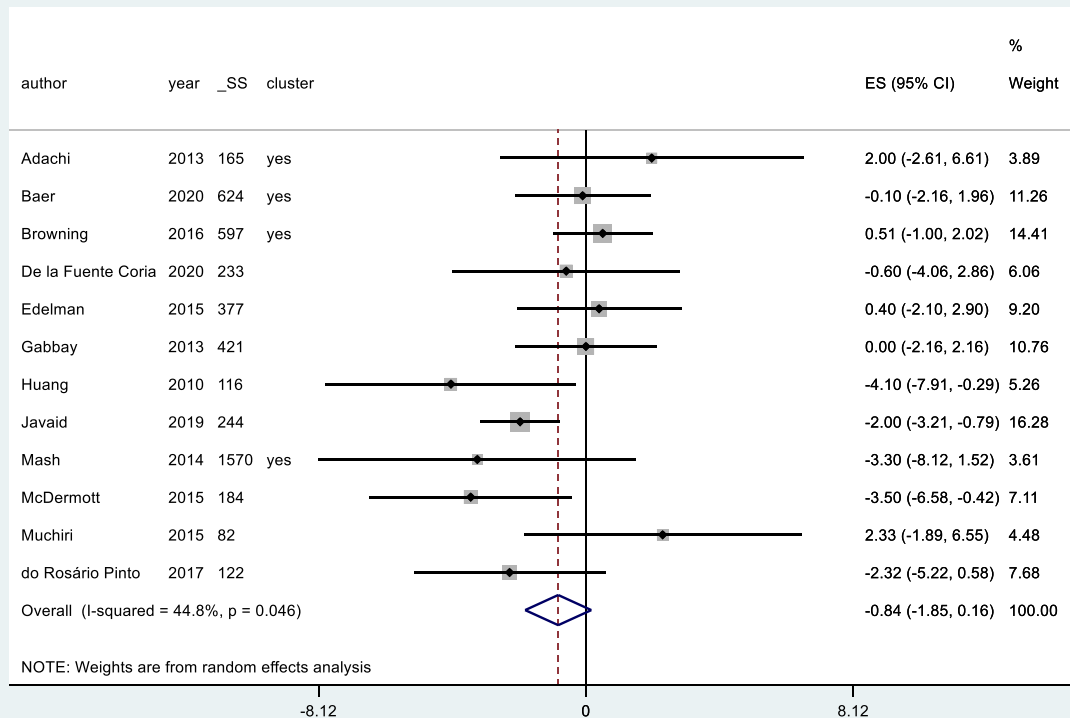

**Figure S12** Meta-analysis of nutritional therapy for diabetes mellitus. Secondary outcome: diastolic blood pressure.

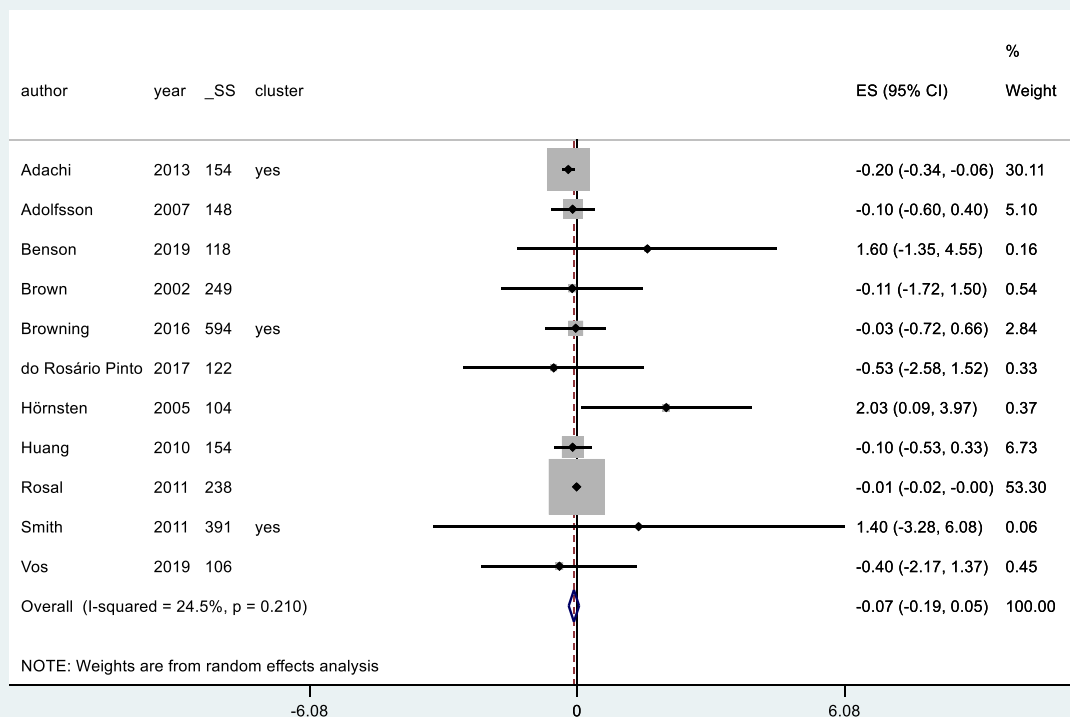

**Figure S13** Meta-analysis of nutritional therapy for diabetes mellitus. Secondary outcome: body mass index.

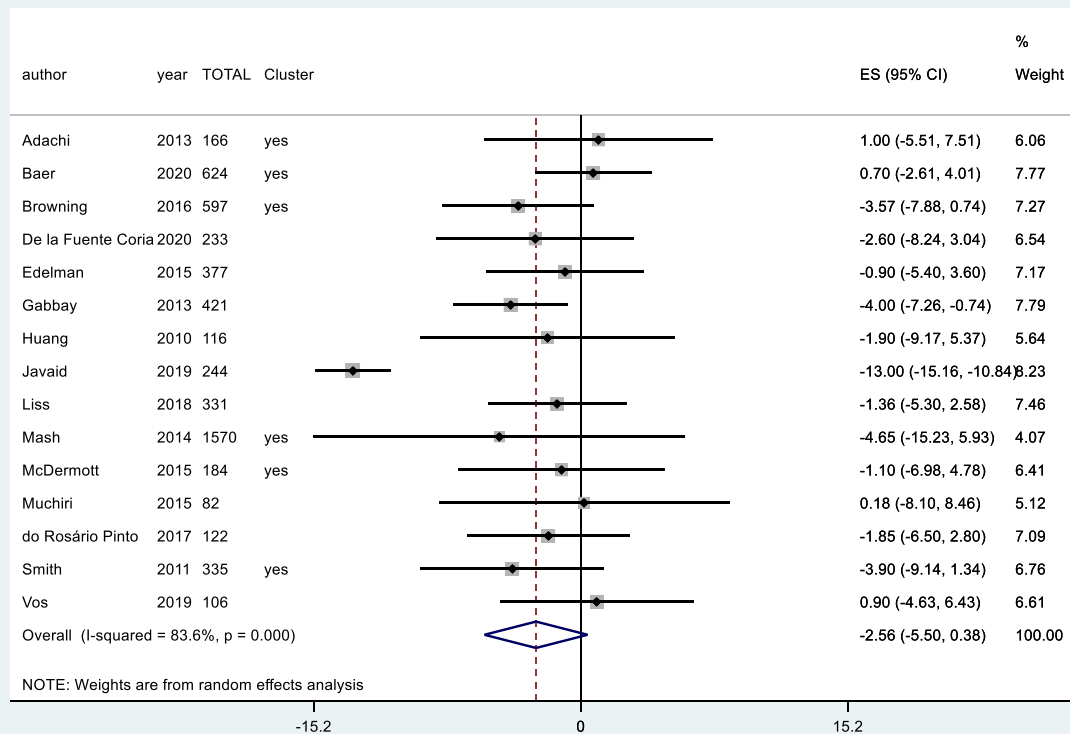

**Figure S14** Meta-analysis of nutritional therapy for diabetes mellitus. Secondary outcome: systolic blood pressure.

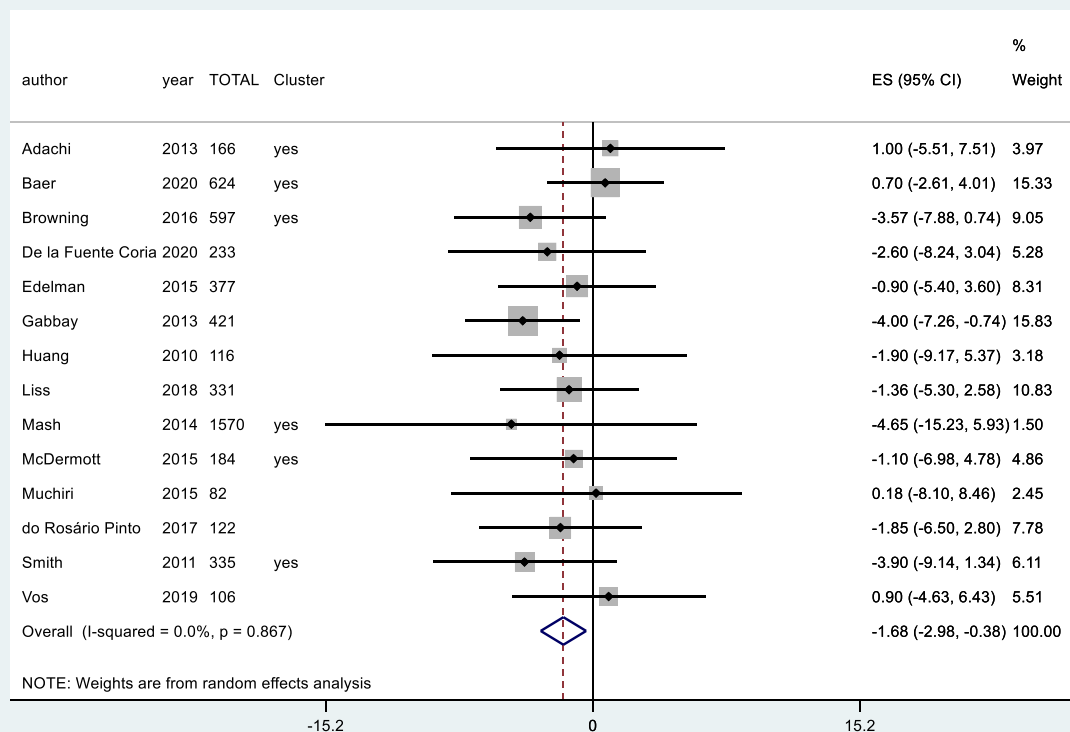

**Figure S15** Meta-analysis of nutritional therapy for diabetes mellitus without Javaid et al. Secondary outcome: systolic blood pressure.

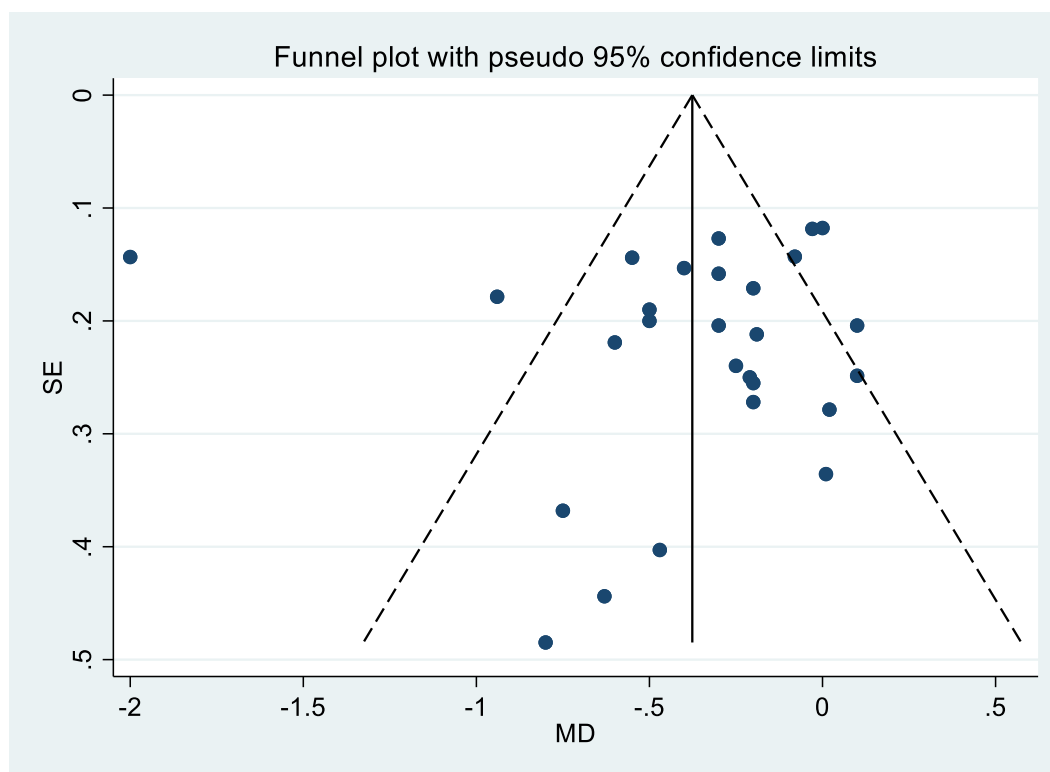

**Figure S16.** Funnel plot assessing publication bias on the meta-analysis of nutritional therapy for diabetes mellitus for the primary outcome (i.e.HbA1c)
